# Supplementary material for: Salivary gland ultrasound abnormalities in primary Sjögren’s syndrome: consensual US-SG core items definition and reliability
Source: PubMed Central journal article supplement (PMC5575597; doi:10.1136/rmdopen-2016-000364), 2017-06-09
Supplement: rmdopen-2016-000364supp002.pdf [file rmdopen-2016-000364supp002.pdf]

# Ultrasonography of Parotid and submandibular glands in primary Sjögren Syndrome

A novel reference atlas for B-mode  
evaluation of parotid and submandibular glands

Sandrine Jousse-Joulin et. al

# Included Salivary glands

- Parotid glands
  - Submandibular glands
- 7 items:
- Echogenicity (normal or abnormal)
  - Homogeneity and its related items:
    1. Hyperechoic bands:
      - Presence of hyperechoic bands <20%
      - hyperechoic bands between 20%-50%
      - hyperechoic bands >50%
    2. Hypo/anechoic area:
      - Isolated <25%
      - Localized 25-50%
      - Scattered
      - Diffuse >50%
    - Lymph nodes
    - Calcifications (present or not)
    - Posterior border ( visible or not)

# PAROTID GLAND PROCEDURE

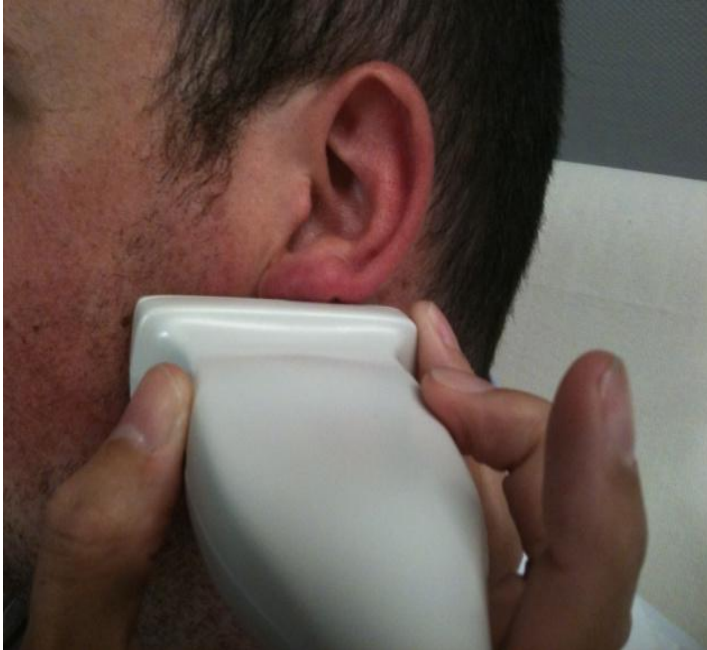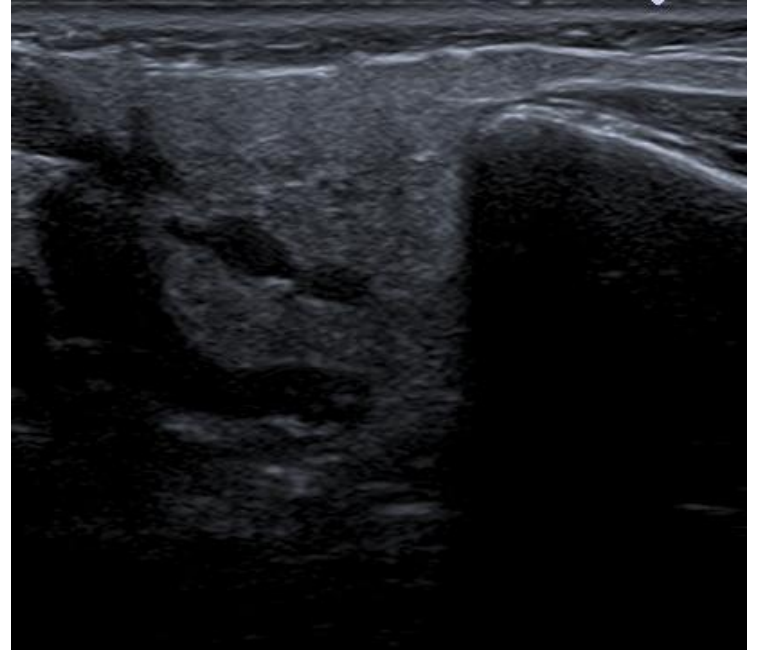

## Parotid gland in axial scan

Jousse-Joulin al.  
Ultrasonography scoring  
reference atlas ver 1.0

# PAROTID GLAND PROCEDURE

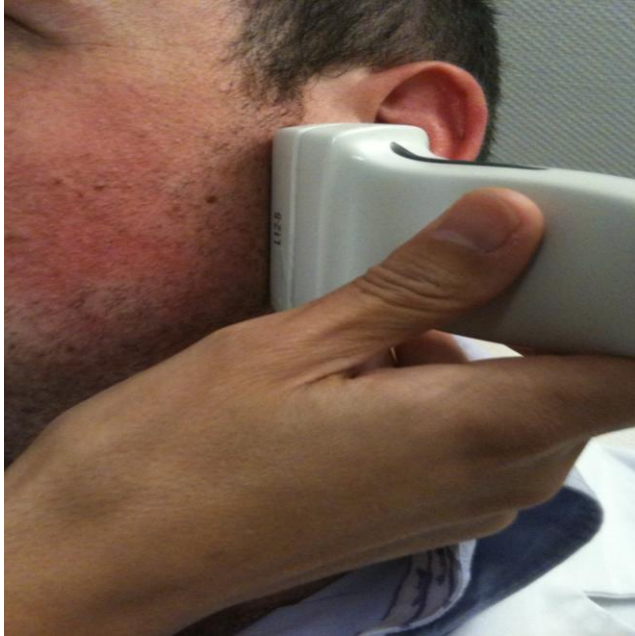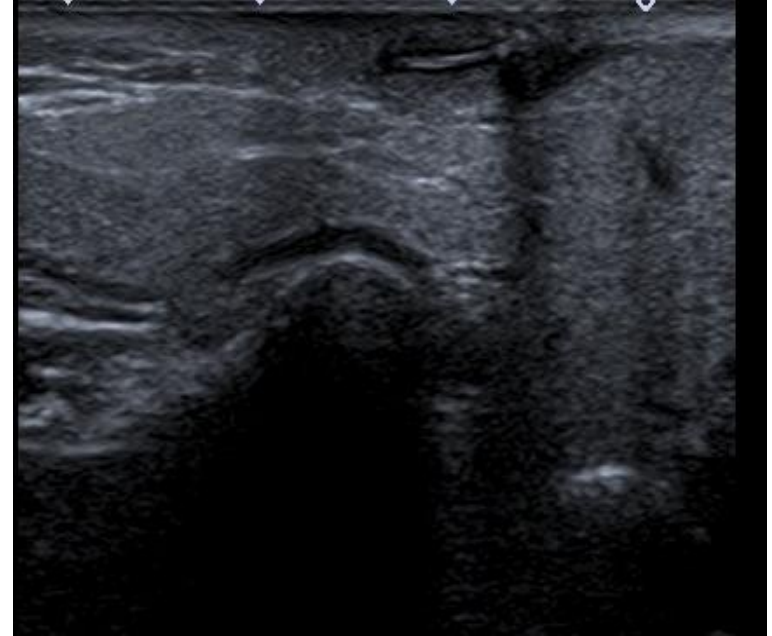

Parotid gland in longitudinal scan

Jousse-Joulin al.  
Ultrasonography scoring  
reference atlas ver 1.0

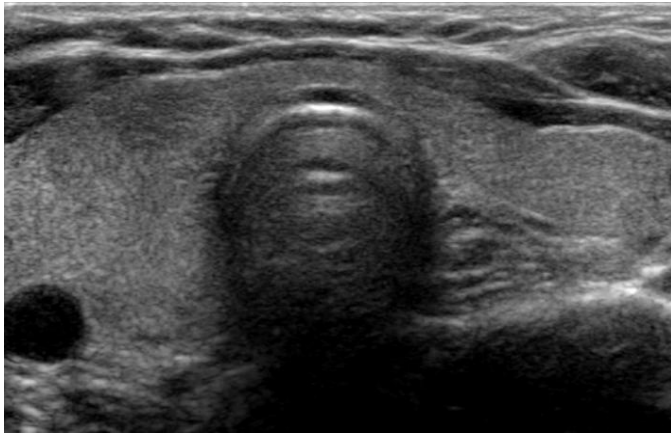

Thyroid parenchyma

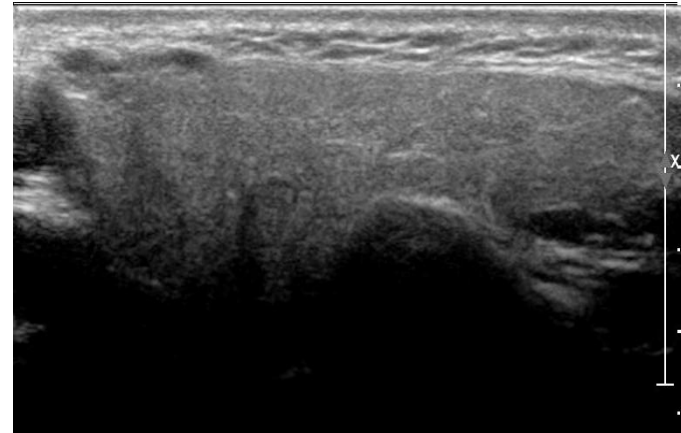

Parotid parenchyma

## Normal echogenicity

Jousse-Joulin al.  
Ultrasonography scoring  
reference atlas ver 1.0

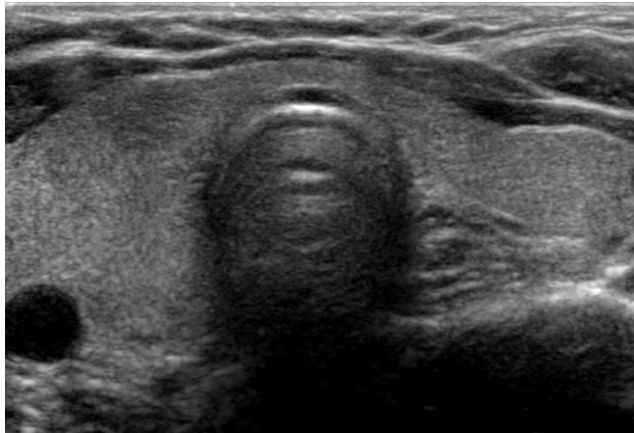

Thyroid parenchyma

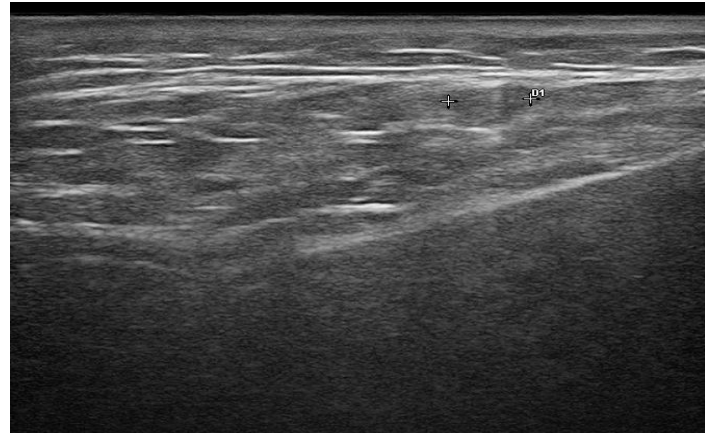

Parotid parenchyma

## Abnormal echogenicity

Jousse-Joulin al.  
Ultrasonography scoring  
reference atlas ver 1.0

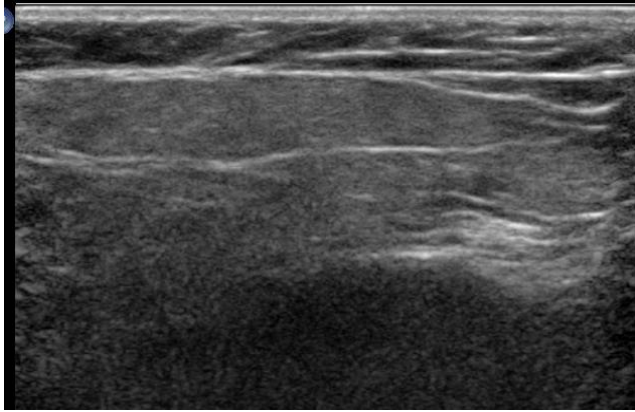

1

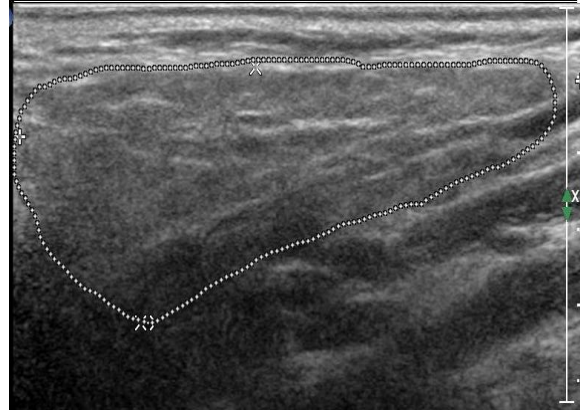

2

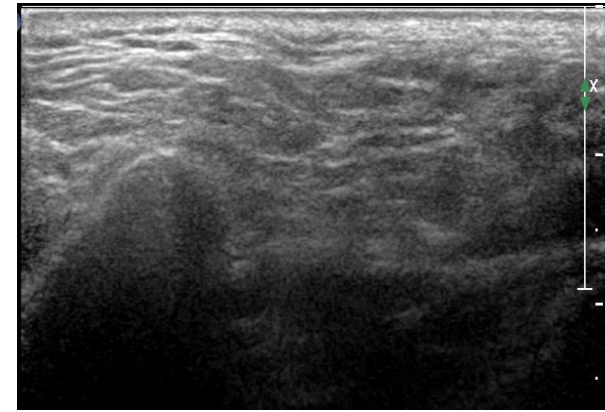

3

## Hyperechoic bands in parotid gland parenchyma:

1. Less than 20% of the surface
2. Between 20-50% of the surface
3. More than 50% of the surface

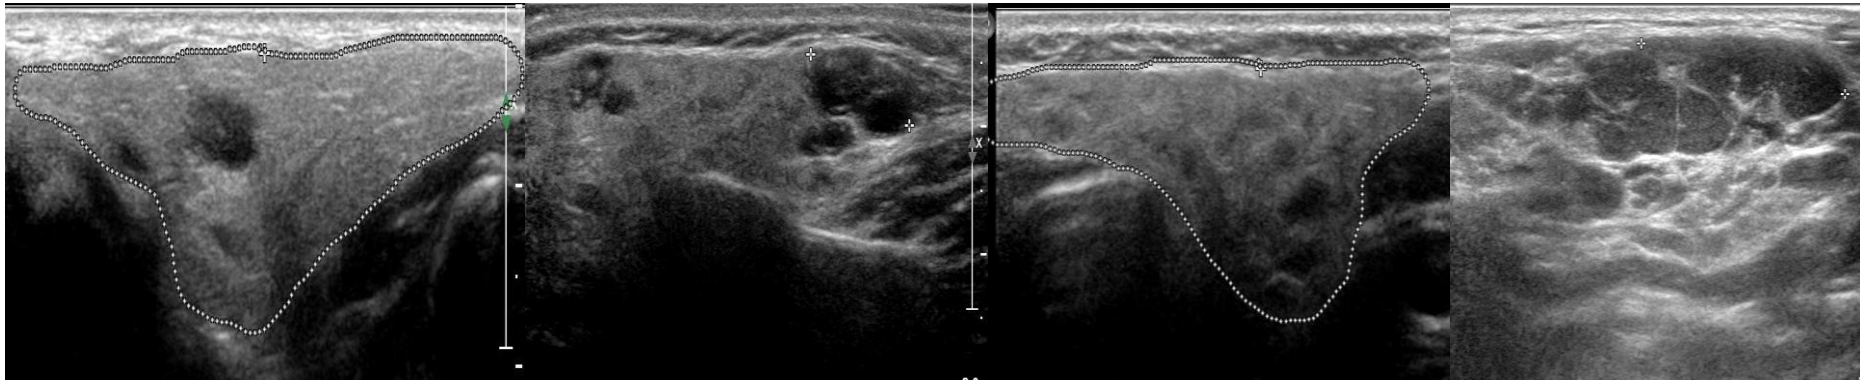

isolated

localized

scattered

diffuse

# Hypo/Anechoic areas diffuse in parotid parenchyma

Jousse-Joulin al.  
Ultrasonography scoring  
reference atlas ver 1.0



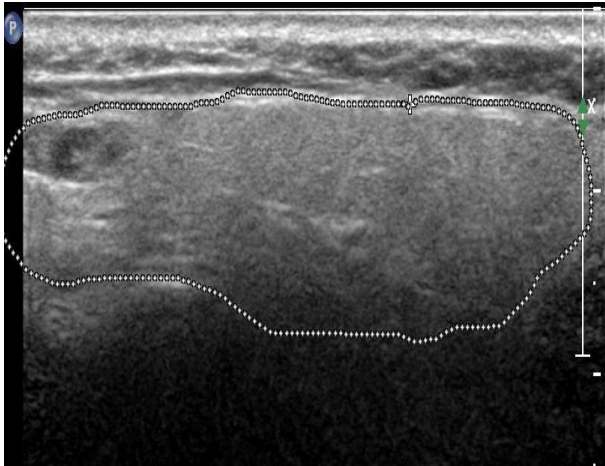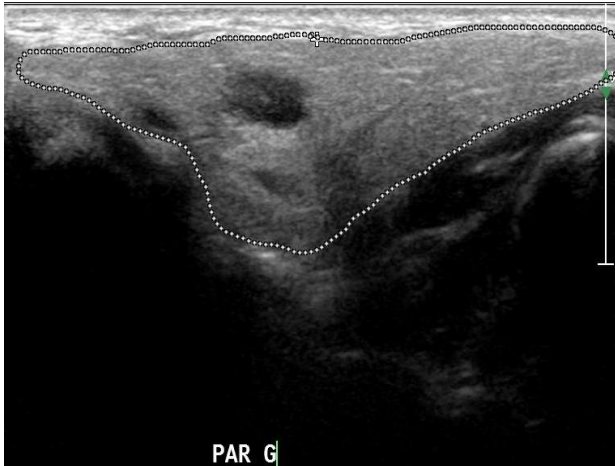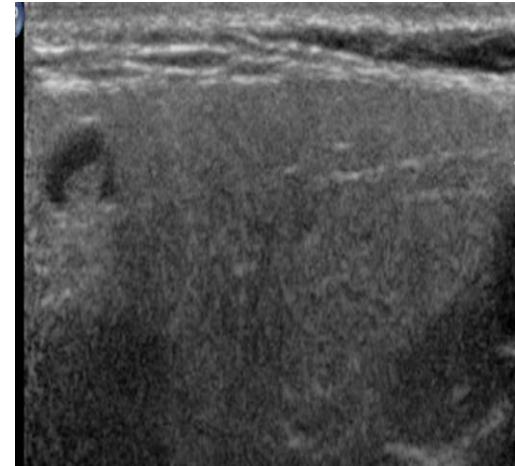

# Normal lymph nodes in parotid gland

Jousse-Joulin al.  
Ultrasonography scoring  
reference atlas ver 1.0

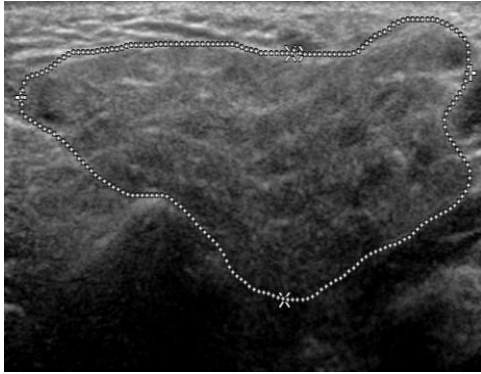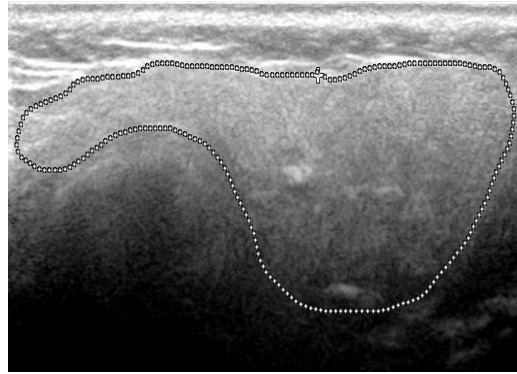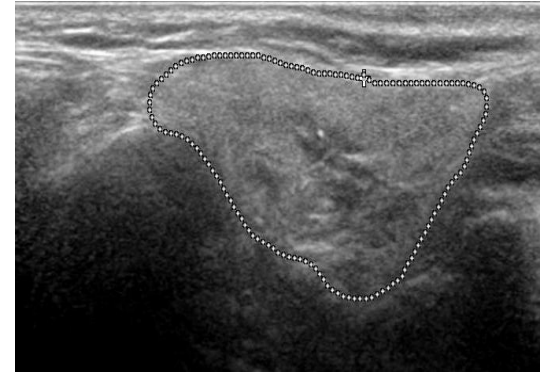

# Calcifications in parotid gland

Jousse-Joulin al.  
Ultrasonography scoring  
reference atlas ver 1.0

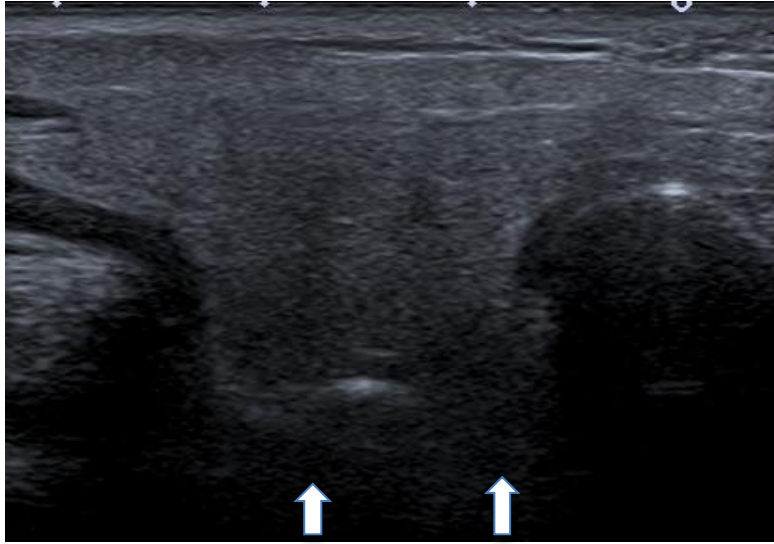

Axial scan

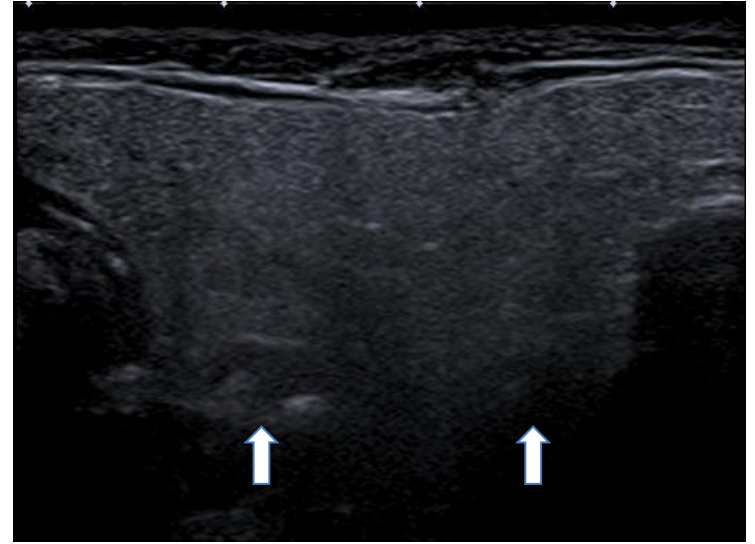

Longitudinal scan

# Visible Posterior border in parotid gland

Jousse-Joulin al.  
Ultrasonography scoring  
reference atlas ver 1.0

# SUBMANDIBULAR GLAND PROCEDURE

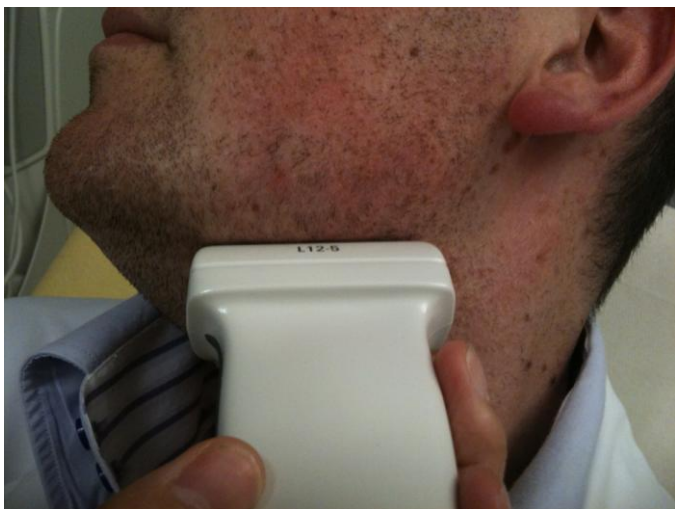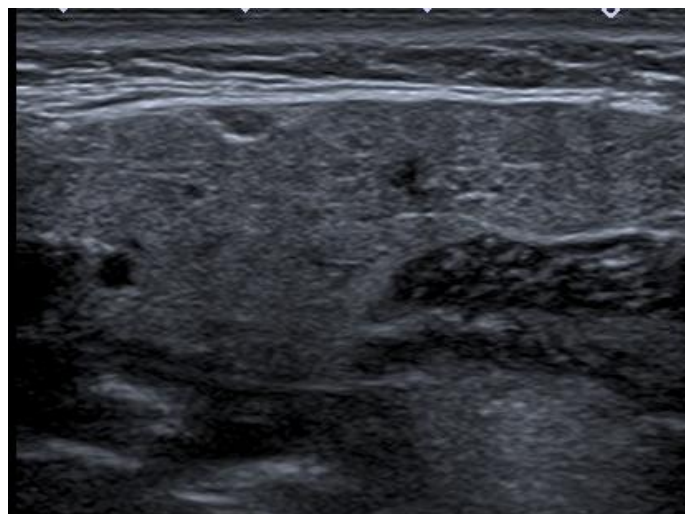

Jousse-Joulin al.  
Ultrasonography scoring  
reference atlas ver 1.0



Thyroid parenchyma

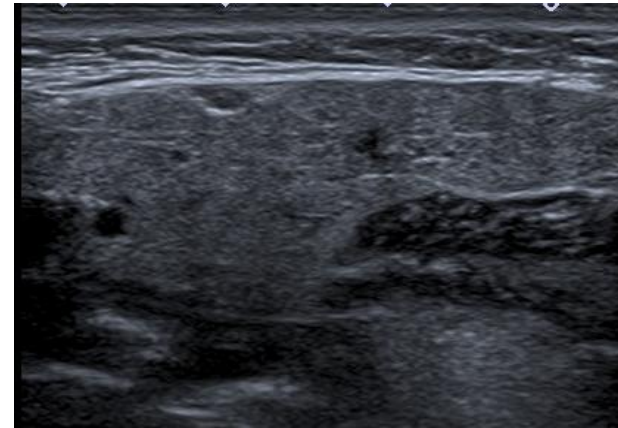

Submandibular parenchyma

## Normal echogenicity

Jousse-Joulin al.  
Ultrasonography scoring  
reference atlas ver 1.0



Thyroid parenchyma

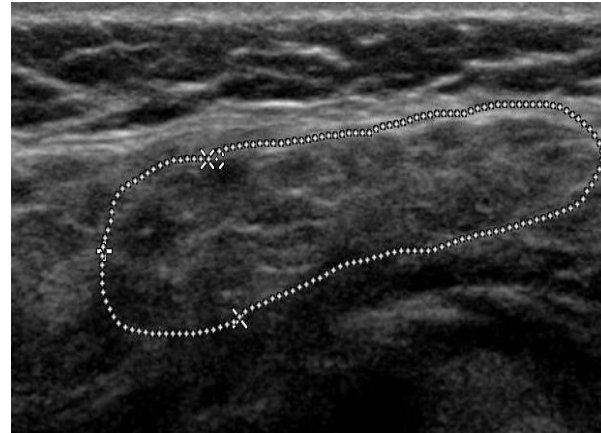

Submandibular parenchyma

# Abnormal echogenicity

Jousse-Joulin al.  
Ultrasonography scoring  
reference atlas ver 1.0

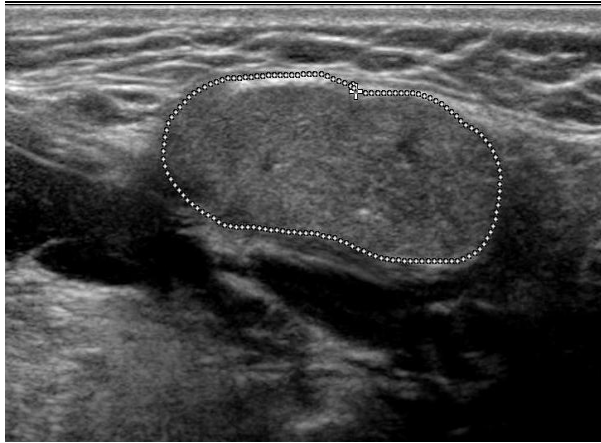

1

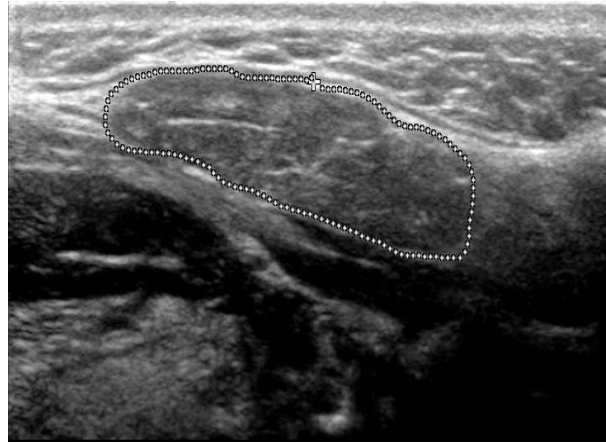

2

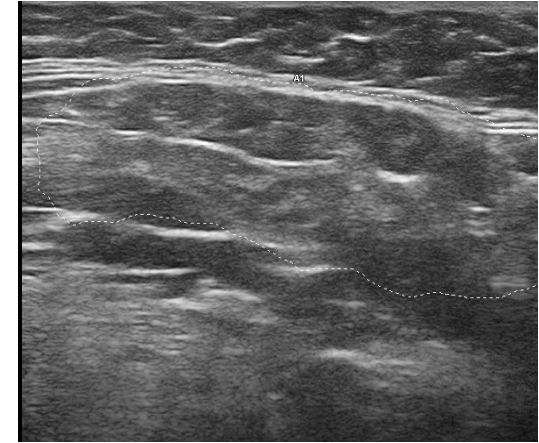

3

## Hyperechoic bands in submandibular gland parenchyma:

1. Less than 20% of the surface
2. Between 25-50% of the surface
3. More than 50% of the surface

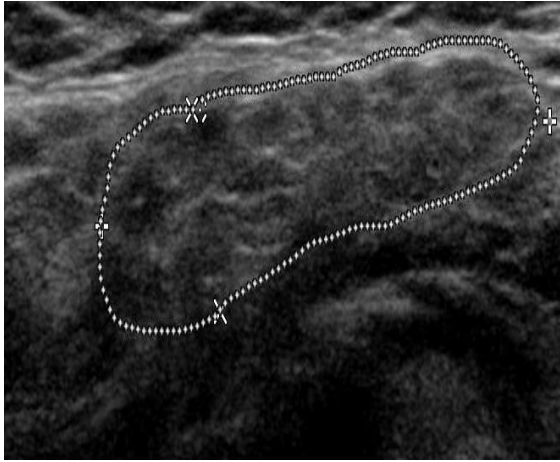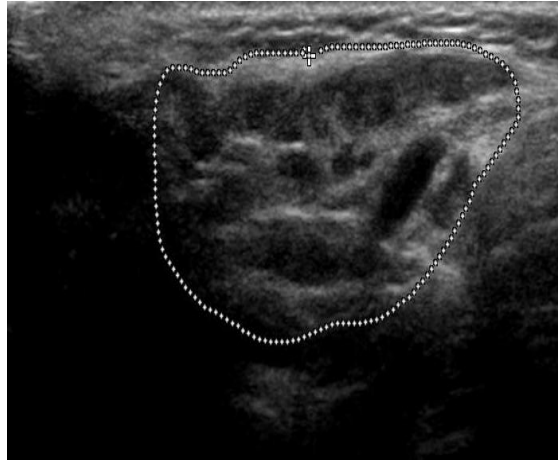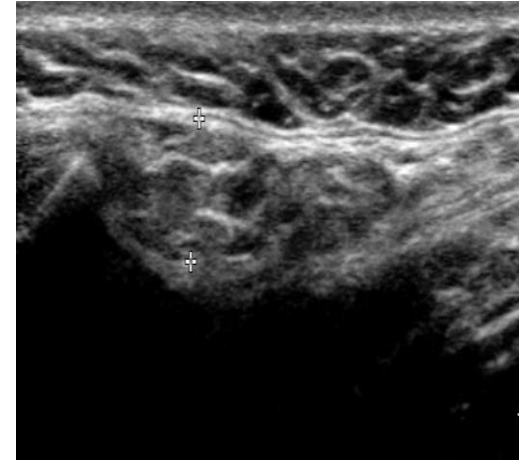

Hypo/Anechoic areas diffuse in submandibular parenchyma

Jousse-Joulin al.  
Ultrasonography scoring  
reference atlas ver 1.0



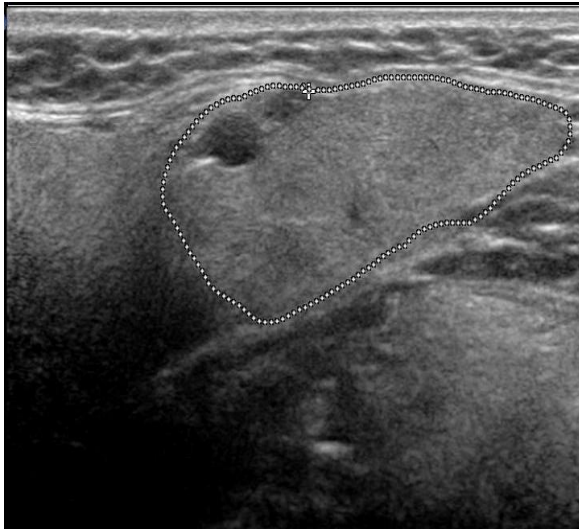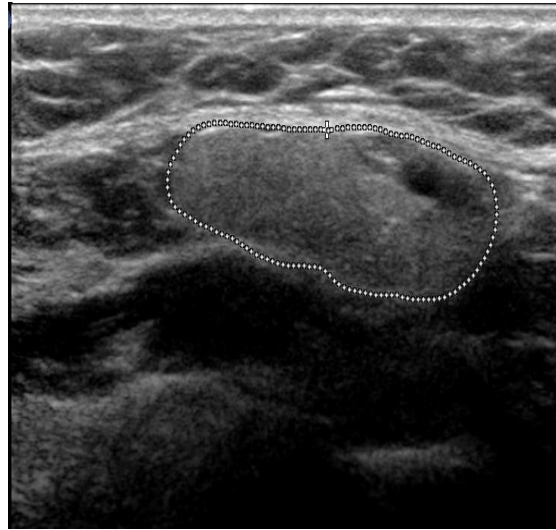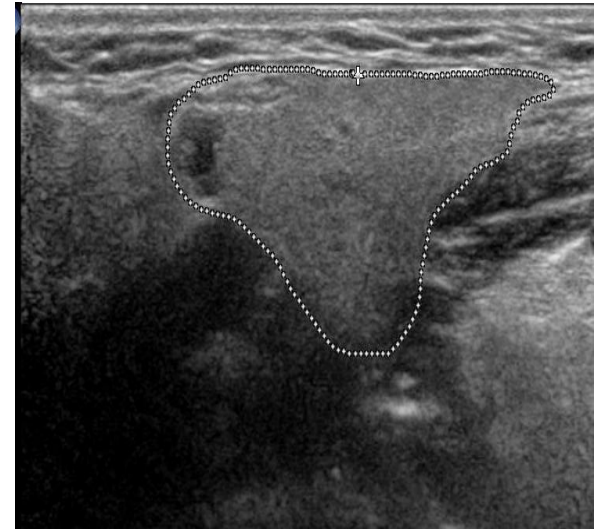

Hypo/Anechoic areas isolated in submandibular parenchyma

Jousse-Joulin al.  
Ultrasonography scoring  
reference atlas ver 1.0

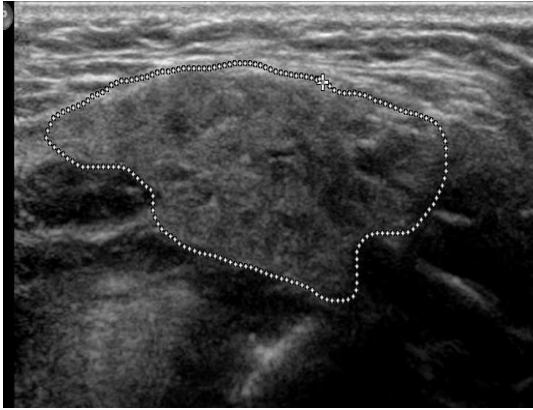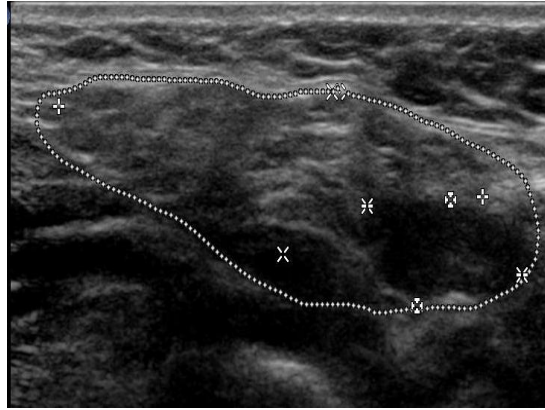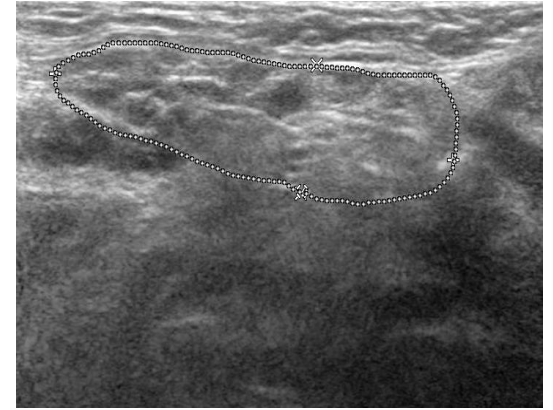

Hypo/Anechoic areas localized in submandibular parenchyma

Jousse-Joulin al.  
Ultrasonography scoring  
reference atlas ver 1.0

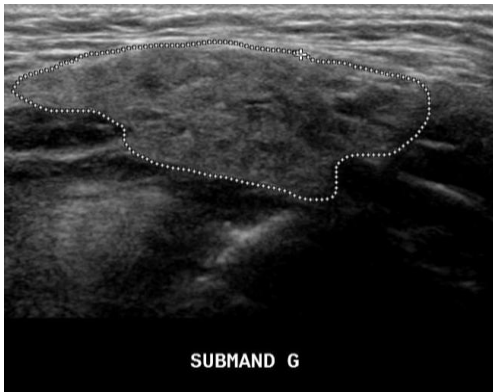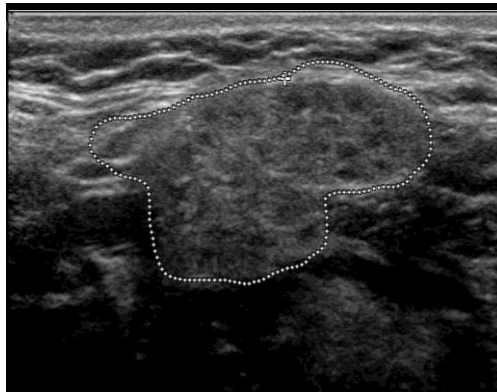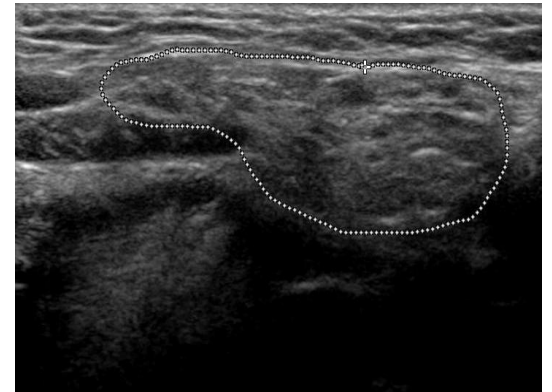

Hypo/Anechoic areas scattered in submandibular gland

Jousse-Joulin al.  
Ultrasonography scoring  
reference atlas ver 1.0

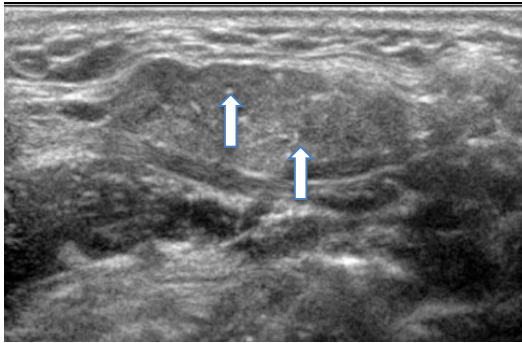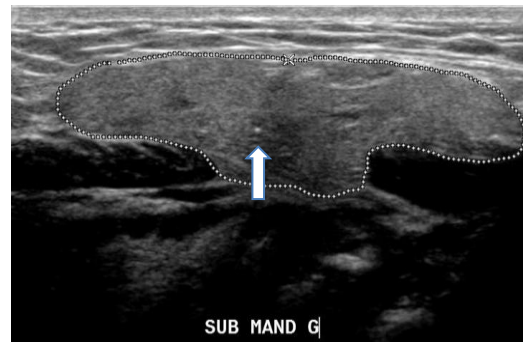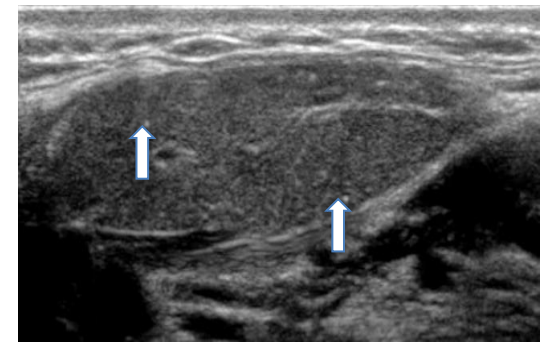

## Calcifications in submandibular gland

Jousse-Joulin al.  
Ultrasonography scoring  
reference atlas ver 1.0

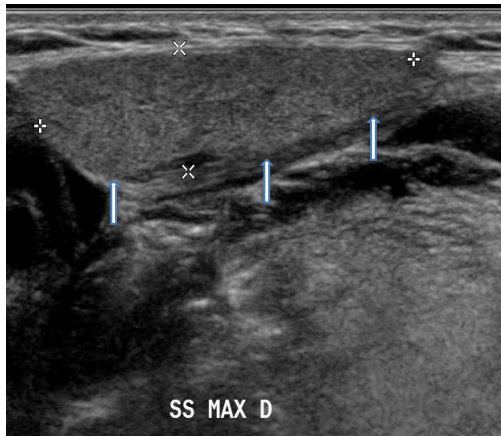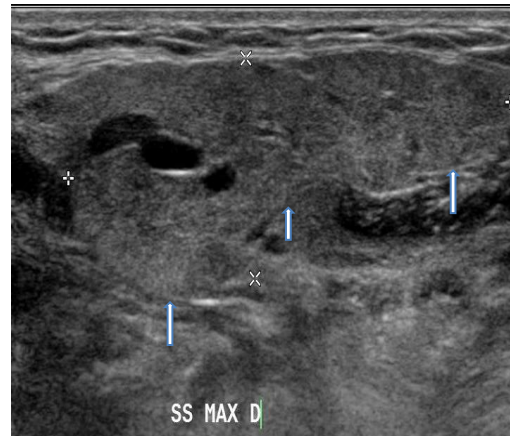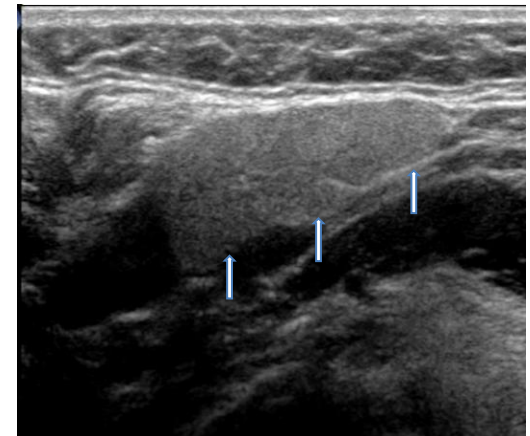

Visible posterior border in submandibular gland

Jousse-Joulin al.  
Ultrasonography scoring  
reference atlas ver 1.0
